# Supplementary material for: B-1a cells acquire their unique characteristics by bypassing the pre-BCR selection stage
Source: PubMed Central journal article supplement (PMC6802180; doi:10.1038/s41467-019-12824-z), 2019-10-18
Supplement: 41467_2019_12824_MOESM1_ESM.pdf [file 41467_2019_12824_MOESM1_ESM.pdf]

**B-1a cells acquire their unique characteristics by bypassing the pre-BCR selection stage.**

Wong et al.

**Supplementary Tables 1-2**

|                                             |                 | No $\gamma$ -H2AX association |             | $\gamma$ -H2AX association |             | Sample size (cells) |
|---------------------------------------------|-----------------|-------------------------------|-------------|----------------------------|-------------|---------------------|
|                                             |                 | number                        | %           | number                     | %           |                     |
| Exp1                                        | BM pro-B        | 123                           | 96.9        | 4                          | 3.1         | 127                 |
|                                             | BM pre-B        | 86                            | 72.9        | 32                         | 27.1        | 118                 |
|                                             | FL pro-B        | 125                           | 84.5        | 23                         | 15.5        | 148                 |
| Exp2                                        | BM pro-B        | 231                           | 97.1        | 7                          | 2.9         | 238                 |
|                                             | BM pre-B        | 139                           | 67.1        | 68                         | 32.9        | 207                 |
|                                             | FL pro-B        | 60                            | 82.2        | 13                         | 17.8        | 73                  |
| <b>TOTAL:</b>                               | <b>BM pro-B</b> | <b>354</b>                    | <b>97.0</b> | <b>11</b>                  | <b>3.0</b>  | <b>365</b>          |
|                                             | <b>BM pre-B</b> | <b>225</b>                    | <b>69.2</b> | <b>100</b>                 | <b>30.8</b> | <b>325</b>          |
|                                             | <b>FL pro-B</b> | <b>185</b>                    | <b>83.7</b> | <b>36</b>                  | <b>16.3</b> | <b>221</b>          |
| Statistical analysis (Fisher's exact test): |                 |                               |             | p-value                    |             | Level               |
| BM pro-B vs BM pre-B                        |                 |                               |             | 2.12e-15                   |             | ***                 |
| BM pro-B vs FL pro-B                        |                 |                               |             | 5.89e-6                    |             | ***                 |
| BM pre-B vs FL pre-B                        |                 |                               |             | 1.19e-3                    |             | **                  |

**Supplementary Table 1** Data table summarizing two independent experiments immuno-FISH experiments for  $\gamma$ -H2AX association with the *Igk* locus in bone marrow pro-B cells, bone marrow pre-B cells and Fetal liver pro-B cells. Significance level was determined using Fisher's exact test on the combined data from the two experiments.

| Rearrangement sequencing primers |                                  |
|----------------------------------|----------------------------------|
| Name                             | Primer Sequence 5' to 3'         |
| IgH V-FR3-1                      | AAGTTCAAGGGCAAGGCC               |
| IgH V-FR3-2                      | CTCCAAGAGCCAAGTTTTCTT            |
| IgH V-FR3-3                      | CAATCTCCAAGGATACCTCCA            |
| IgH V-FR3-4                      | CGITTCACCATCTCCAGAGA             |
| IgH V-12                         | ACTTTCTACAACCCATCTCT             |
| IgH V-11                         | ACGCACCATCCATAAAGGAT             |
| IgH V-6                          | AGGTTCAACCATCTCAAGAGA            |
| IgH V-9                          | TTCAAGGGACGGTTTGCCTT             |
| IgH reverse [J1/4]               | CTTACCTGAGGAGACGGTGAC            |
| IgH reverse [J2]                 | AGGACTCACCTGAGGAGAC              |
| IgH reverse [J3]                 | AGGACTCACCTGCAGAGAC              |
| Igk forward Vk -sense IgL        | GGCTGCAGSTTCAGTGGCAGTGGRTCWGGRAC |
| Igk forward Vk9-128              | TCAAGGTTCAAGTGGCAGTGGGTCTTAGTC   |
| Igk forward Vk14-126             | GGGGTCCCATCAAGATTCAGTGGCAGTGGATC |
| Igk reverse [J1/2]               | TACTTACGTTTKATTTCCAGCTTGGT       |
| Igk reverse [J3/4]               | TACTTAGGTTTTATTTCCAGTCTGGT       |
| Igk reverse [J5]                 | TACTTACGTTTCAGCTCCAGCTTGGT       |

**Supplementary Table 2** List of primers used to PCR amplify *Igh* and *Igk* DNA rearrangements for B cell repertoire sequencing.
